# Supplementary material for: Differences Between Supplier and Customer Experiences of Marketing Mix in the Construction Industry
Source: Frontiers journal article supplement (doi:10.3389/fbuil.2022.811186), 2022-04-27
Supplement: Data_Sheet_1.pdf [file Data_Sheet_1.pdf]

## Appendix I. Questionnaire (Supplier)

| Factor            | Code | Description                                                                                                             |
|-------------------|------|-------------------------------------------------------------------------------------------------------------------------|
| Product           | PD01 | We focus on offering 'specialized' services to our customers.                                                           |
|                   | PD02 | Our marketing strategy emphasizes on delivering the 'right' quality of products to customers.                           |
|                   | PD03 | Our marketing strategy clearly differentiates our product from its competitors.                                         |
|                   | PD04 | Our marketing strategy helps the consumer to develop an ongoing relationship with a product.                            |
|                   | PD05 | We conduct market research to know how our customers think about our products.                                          |
|                   | PD06 | Our product strategy emphasized the benefits of the product to customers rather than the features of the product.       |
| Place             | PL01 | Handling maintenance problems                                                                                           |
|                   | PL02 | Delivery time and reliability                                                                                           |
|                   | PL03 | Invoicing                                                                                                               |
|                   | PL04 | Handling complaints                                                                                                     |
|                   | PL05 | Handling delivery problems                                                                                              |
|                   | PL06 | Speed of order fulfilment                                                                                               |
|                   | PL07 | Our company reaches a wide geographic coverage of customers.                                                            |
| Price             | PC01 | We expand our market share through lower pricing.                                                                       |
|                   | PC02 | Our prices support the product and service package to increase customers' value for money.                              |
|                   | PC03 | We reinforce our product's market position through appropriate pricing.                                                 |
|                   | PC04 | Our prices reinforce the quality image of the product.                                                                  |
|                   | PC05 | Our prices are designed to achieve high market share and customer loyalty.                                              |
|                   | PC06 | Our prices are consistently competitive.                                                                                |
| Promotion         | PM01 | Our promotion activities are positively affecting our reputation and standing with various publics.                     |
|                   | PM02 | Our promotion activities are giving the consumer a clear reason for 'buying' from our company.                          |
|                   | PM03 | We give customers a scope for price negotiation, to let them feel they are gaining value when dealing with us.          |
|                   | PM04 | In our communication with customers, we take into consideration the acceptability of certain approaches to advertising. |
|                   | PM05 | We use promotional methods to motivate potential new customers.                                                         |
| People            | PP01 | The recommendations from our employees are trusted and considered.                                                      |
|                   | PP02 | There is a great deal of interaction between our staff and customers.                                                   |
|                   | PP03 | We appoint team leaders according to their experience and strong people skills.                                         |
|                   | PP04 | Our staff plays a key role in anticipating customers' needs.                                                            |
|                   | PP05 | Continues recruitment and training of staff are very important activities in our company.                               |
|                   | PP06 | We have strong measurement systems and staff appraisals to monitor staff performance in our company.                    |
| Process           | PS01 | Most of the communications between our staff and customers are automated or computerized.                               |
|                   | PS02 | We can anticipate customers' needs and wants in the market in an accurate way through market research.                  |
|                   | PS03 | We have a strong and up-to-date database of customer information in our company.                                        |
|                   | PS04 | We analyze customer data from our database to plan our offers to customers.                                             |
|                   | PS05 | We have more advanced systems and technology than our competitors.                                                      |
| Physical Evidence | PE01 | Our office décor and design positively influence customer's expectations of the service.                                |

|                       |      |                                                                                                  |
|-----------------------|------|--------------------------------------------------------------------------------------------------|
| Company<br>Experience | PE02 | Our company has up-to-date facilities and equipment.                                             |
|                       | PE03 | Professional look of staff                                                                       |
|                       | PE04 | Our staff takes very good care of their appearance to positively affect customer's satisfaction. |
|                       | PE05 | Office Furniture and atmosphere.                                                                 |
|                       | PE06 | Our informative materials (website, advertisements, brochures, etc.) are visually appealing.     |
|                       | CE01 | I am happy with my current construction company as my product provider.                          |
|                       | CE02 | My construction company keeps me informed.                                                       |
|                       | CE03 | I have built a personal relationship with the people at these companies.                         |
|                       | CE04 | My construction company demonstrates flexibility in dealing with me.                             |
|                       | CE05 | They keep me up-to-date.                                                                         |
|                       | CE06 | They have dealt well with me when things went wrong.                                             |
|                       | CE07 | They know exactly what I want.                                                                   |
|                       | CE08 | They deliver good customer service.                                                              |
|                       | CE09 | The people I am dealing with at these companies have good people skills.                         |
|                       | CE10 | Their online facilities are designed to be as efficient as possible.                             |
|                       | CE11 | The offer of company that I have chosen has the best quality.                                    |
|                       | CE12 | The people who work at these companies represent their own brand well.                           |

---

## Appendix II. Questionnaire (Customer)

| Factor            | Code | Description                                                                                                               |
|-------------------|------|---------------------------------------------------------------------------------------------------------------------------|
| Product           | PD01 | Their product's offer does not emphasize the attributes that are important to me.                                         |
|                   | PD02 | They attract more new customers than their competitors.                                                                   |
|                   | PD03 | Their products and services do not always meet the requirements of customers.                                             |
|                   | PD04 | Their strategy emphasized the benefits of their products to customers.                                                    |
|                   | PD05 | The product strategy of the construction companies does not respond to our needs and wants as customers in the market.    |
| Place             | PD06 | Their range of brands helps me to make better choices.                                                                    |
|                   | PL01 | Handling maintenance problems                                                                                             |
|                   | PL02 | Delivery time and reliability                                                                                             |
|                   | PL03 | Invoicing                                                                                                                 |
|                   | PL04 | Handling complaints                                                                                                       |
|                   | PL05 | Handling delivery problems                                                                                                |
|                   | PL06 | Speed of order fulfillment                                                                                                |
| Price             | PL07 | Construction companies cannot reach a wide geographic coverage of customers.                                              |
|                   | PC01 | They expand their market share through lower pricing.                                                                     |
|                   | PC02 | Their prices emphasize the better cost savings compared with the competition.                                             |
|                   | PC03 | Their prices reinforce the quality image of their products                                                                |
|                   | PC04 | Their prices increase customers' value for money.                                                                         |
|                   | PC05 | Their prices do not take into consideration the differences in lifestyles and price perceptions among consumers.          |
| Promotion         | PC06 | Their prices are consistent with their competitive prices.                                                                |
|                   | PM01 | When communicating with customers, they take into consideration the acceptability of certain approaches to advertising.   |
|                   | PM02 | They give customers a scope for price negotiation, to let them feel they are gaining value when dealing with the company. |
|                   | PM03 | Their promotion activities provide the consumer a clear reason for 'buying' from them.                                    |
|                   | PM04 | They use promotion to motivate to new customers to buy from them.                                                         |
| People            | PM05 | Their promotion activities are positively affecting their reputation among consumers.                                     |
|                   | PP01 | Employee recommendations are trusted and considered in these companies.                                                   |
|                   | PP02 | There is a great deal of interaction between the staff and customers.                                                     |
|                   | PP03 | Staff team leaders have great experience and strong people skills.                                                        |
|                   | PP04 | The staff play a key role in anticipating customers' needs.                                                               |
|                   | PP05 | Employees of these companies always provide prompt service to customers.                                                  |
| Process           | PP06 | Customers are treated well in these companies.                                                                            |
|                   | PS01 | They can anticipate customers' needs and wants in the market in an accurate way.                                          |
|                   | PS02 | They are efficient in order processing and reducing customers' waiting time.                                              |
|                   | PS03 | They are very innovative in-service delivery compared to competition.                                                     |
|                   | PS04 | Most of the communications between their staff and customers are automated or computerized.                               |
| Physical Evidence | PS05 | They have a strong and up-to-date database of customer information in the company.                                        |
|                   | PE01 | Office Furniture and atmosphere                                                                                           |
|                   | PE02 | Professional look of staff                                                                                                |
|                   | PE03 | The professional look of their website, business cards and brochures.                                                     |
|                   | PE04 | Their offices' décor and design positively influence customer's expectations of the service.                              |

|                       |      |                                                                                                    |
|-----------------------|------|----------------------------------------------------------------------------------------------------|
| Company<br>Experience | PE05 | The company has up-to-date facilities and equipment.                                               |
|                       | PE06 | Their staff takes very good care of their appearance to positively affect customer's satisfaction. |
|                       | CE01 | I am happy with my current construction company as my product provider.                            |
|                       | CE02 | My construction company keeps me informed.                                                         |
|                       | CE03 | I have built a personal relationship with the people at these companies.                           |
|                       | CE04 | My construction company demonstrates flexibility in dealing with me.                               |
|                       | CE05 | They keep me up-to-date.                                                                           |
|                       | CE06 | They have dealt well with me when things went wrong.                                               |
|                       | CE07 | They know exactly what I want.                                                                     |
|                       | CE08 | They deliver good customer service.                                                                |
|                       | CE09 | The people I am dealing with at these companies have good people skills.                           |
|                       | CE10 | Their online facilities are designed to be as efficient as possible.                               |
|                       | CE11 | The offer of company that I have chosen has the best quality.                                      |
|                       | CE12 | The people who work at these companies represent their own brand well.                             |

---
